# Supplementary material for: Development of a Guideline to Enhance the Reporting of Concept Mapping Research: Study Protocol
Source: MDPI journal article supplement (doi:10.3390/ijerph19127273), 2022-06-14
Supplement: s1 [file s1]

## Medline Search

### **S. No    Searches**

- 1    Concept mapping study.mp.
- 2    concept map\*.mp.
- 3    concept mapping.mp.
- 4    structured conceptualization.mp.
- 5    1 or 2 or 3 or 4
- 6    Ariadne.mp.
- 7    concept systems.mp.
- 8    6 or 7
- 9    5 or 8
