# Supplementary material for: Development of a Guideline to Enhance the Reporting of Concept Mapping Research: Study Protocol
Source: Int J Environ Res Public Health. 2022 Jun 14;19(12):7273. doi: 10.3390/ijerph19127273 (PMC9223457; doi:10.3390/ijerph19127273)
Supplement: Supplementary file 1 [file ijerph-19-07273-s001.zip › Table S3_Pilot data extraction tool.xlsx]

## Sheet: Sheet1
Study Number	Citation	Corresponding author	Corresponding author email	Title of the Study	Name of the Journal	DOI	Was CM stated in the title of the study	What information about concept mapping was reported in the abstract?	What information was provided in the background	Who developed the focus prompt	how was focus prompt developed	Additional information on focus prompt	Who were the stakeholders	How were stakeholders identified and recruited in the study	How was the flow of participants through the study described	What was the response rate and withdrawal rate	Which phases of concept mapping were undertaken	Data collection period	How was brainstorming conducted	Description of the brainstorming session	How many statements were generated by the participants	Description of statement Reduction process	How was card sorting task undertaken?	Who participated in card sorting tasks and how?	Description of the clustering task	Description of the rating task	How was data analysed	description of additional data analysis	Who interpreted the data	How was data interpretation carried out	what computer software did the authors used to analyze concept mapping data? And in which phases	Results-Participants	Results: Brainstorming	Results: Statement reduction	Results: Prioritizing (clustering/sorting) and rating	Results: Interpretation	Results: Utilization	Discussion	what information was provided in the discussion section (contrast information with what is in current evidence)	Strength and Limitations	Conclusion	Ethics (information about ethical approval, ethics number, and consent)	How consent was obtained from the participants	Ethics (information about preregistration, protocol)	Additional Information

## Sheet: Sheet2
	Published Year
	2016
	2021
	2019
	2012
	2012
	2017
	2006
	2019
	2021
	2018
	2011
	2018
	2015
	2002
	2018
	2011
	2009
	2017
	2020
	2018
	2018
	2019
	2020
	2021
	2013
	2019
	2007
	2007
	2019
	2019
	2019
	2020
	2018
	2009
	2020
	2019
	2021
	2021
	2019
	2011
	2017
	2021
	2017
	2020
	2018
	2018
	2020
	2018
	1993
	2009
	2013
	2019
	2007
	1997
	1998
	2018
	2012
	2019
	2019
	2000
	2005
	2020
	2018
	2020
	2021
	2015
	2016
	2020
	2020
	2021
	2017
	2021
	2021
	2020
	2014
	2020
	2012
	2019
	2020
	2018
	2018
	2021
	2011
	2019
	2020
	2011
	2014
	2016
	2018
	2012
	2014
	2013
	2017
	2017
	2013
	2021
	2010
	2005
	2017
	2020
	2018
	2020
	2010
	2012
	2015
	2013
	2021
	2014
	2020
	2016
	2020
	2006
	2008
	2010
	2019
	2016
	2021
	2007
	2013
	2020
	2018
	2015
	2017
	2014
	2011
	2018
	2021
	1998
	2014
	2016
	2013
	2017
	2011
	2020
	2021
	2021
	2019
	2009
	2015
	2020
	2020
	2018
	2020
	2012
	2015
	2013
	2008
	2005
	2005
	2011
	2019
	2020
	2011
	2013
	2012
	2019
	2020
	2014
	2013
	2019
	2016
	2005
	2009
	2015
	2017
	2018
	2001
	2011
	2001
	2002
	2003
	2018
	2020
	2019
	2020
	2015
	2017
	2013
	2021
	2018
	2008
	2019
	2007
	2020
	2005
	2021
	2016
	2021
	2019
	2016
	2009
	2013
	2017
	2012
	2009
	2012
	2021
	2018
	2015
	2019
	2019
	2010
	2017
	2021
	2016
	2016
	2016
	2017
	2018
	2020
	2020
	2019
	2008
	2012
	2017
	2012
	2021
	2006
	2021
	2019
	2015
	2017
	2019
	2017
	1994
	2004
	2006			rationale for selecting recent studies
	2010			1. 2. 3.
	2015			exponential growth of concept mapping
	2020
	2012
	2013
	2017
	2016
	2018
	2016
	2005
	2013
	2016
	2020
	2018
	2020
	2014
	2019
	2007
	2017
	2012
	2020
	2013
	2018
	2021
	2016
	2019
	2018
	2018
	2008
	2012
	2009
	2017
